# Supplementary material
Source: PubMed Central journal article supplement (PMC4035960)

**MaxEnt model for mid-Holocene  
climate model: bcc-csm1-1**

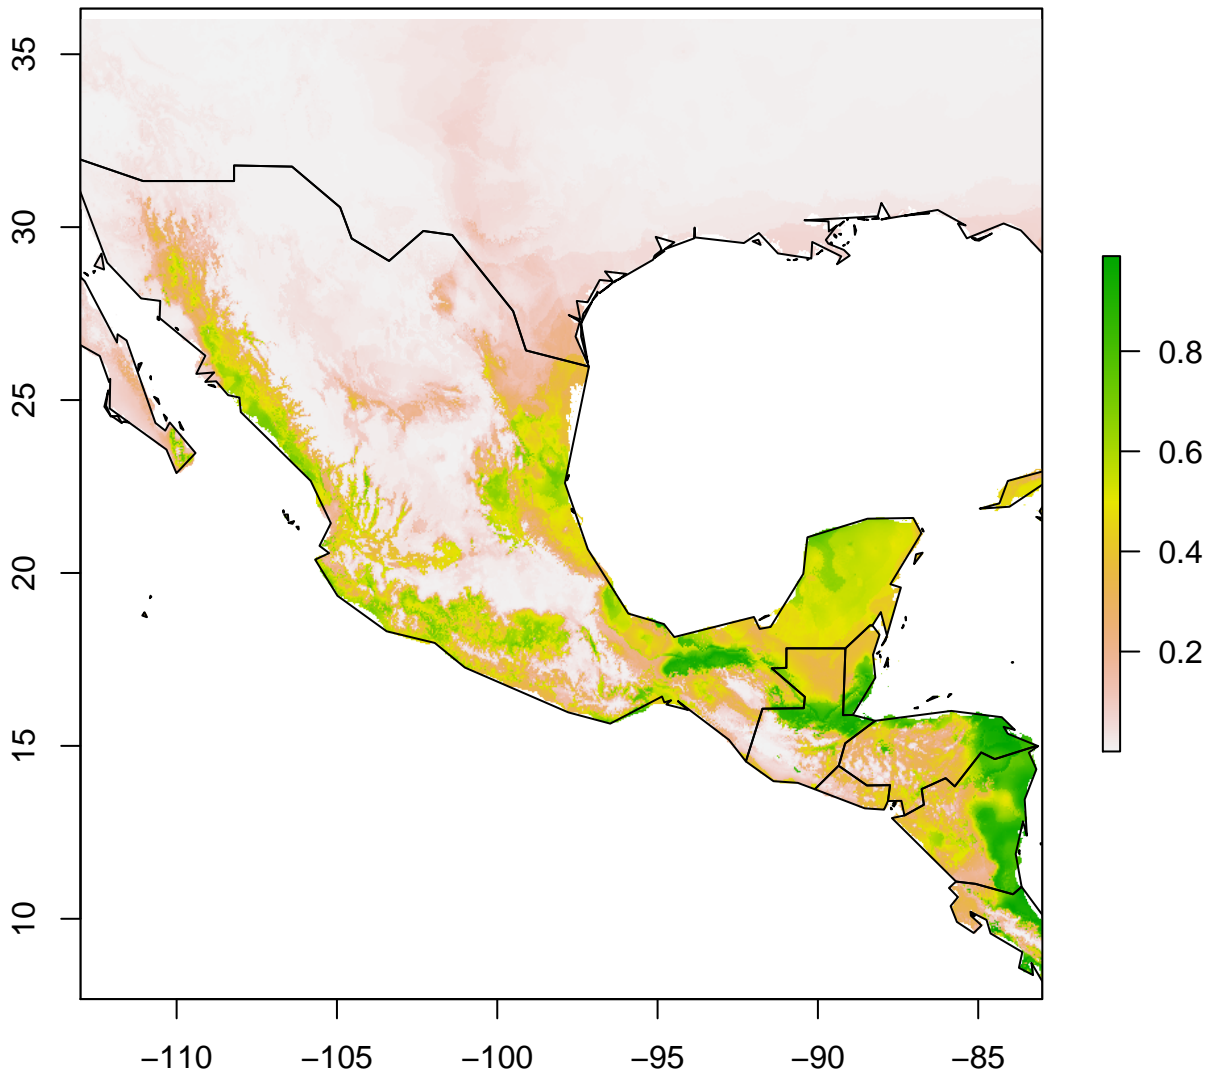

**MaxEnt model for mid-Holocene  
climate model: CCSM4**

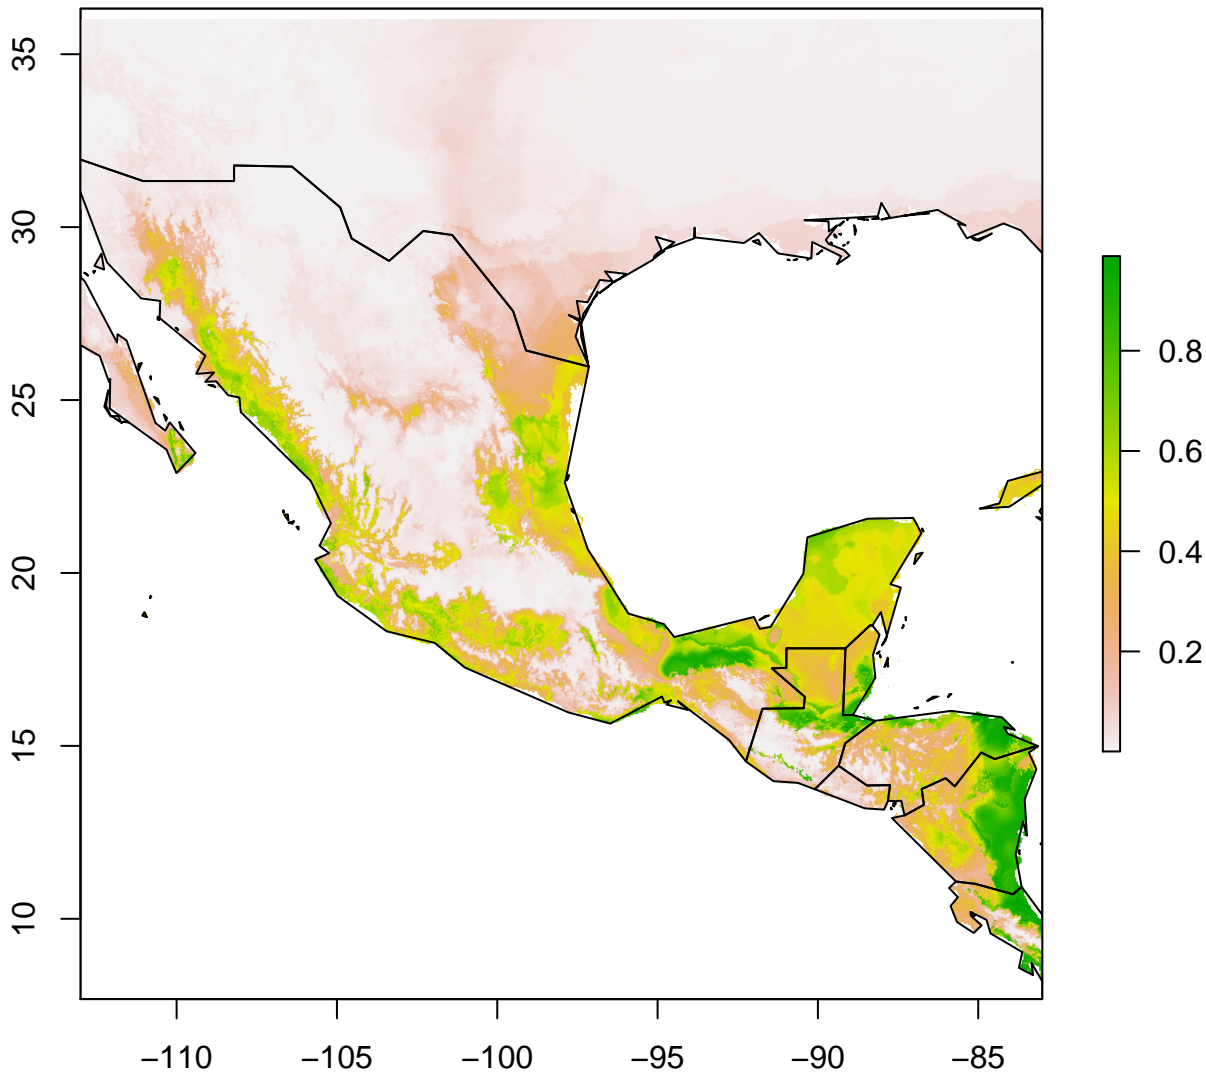

**MaxEnt model for mid-Holocene  
climate model: CNRM-CM5**

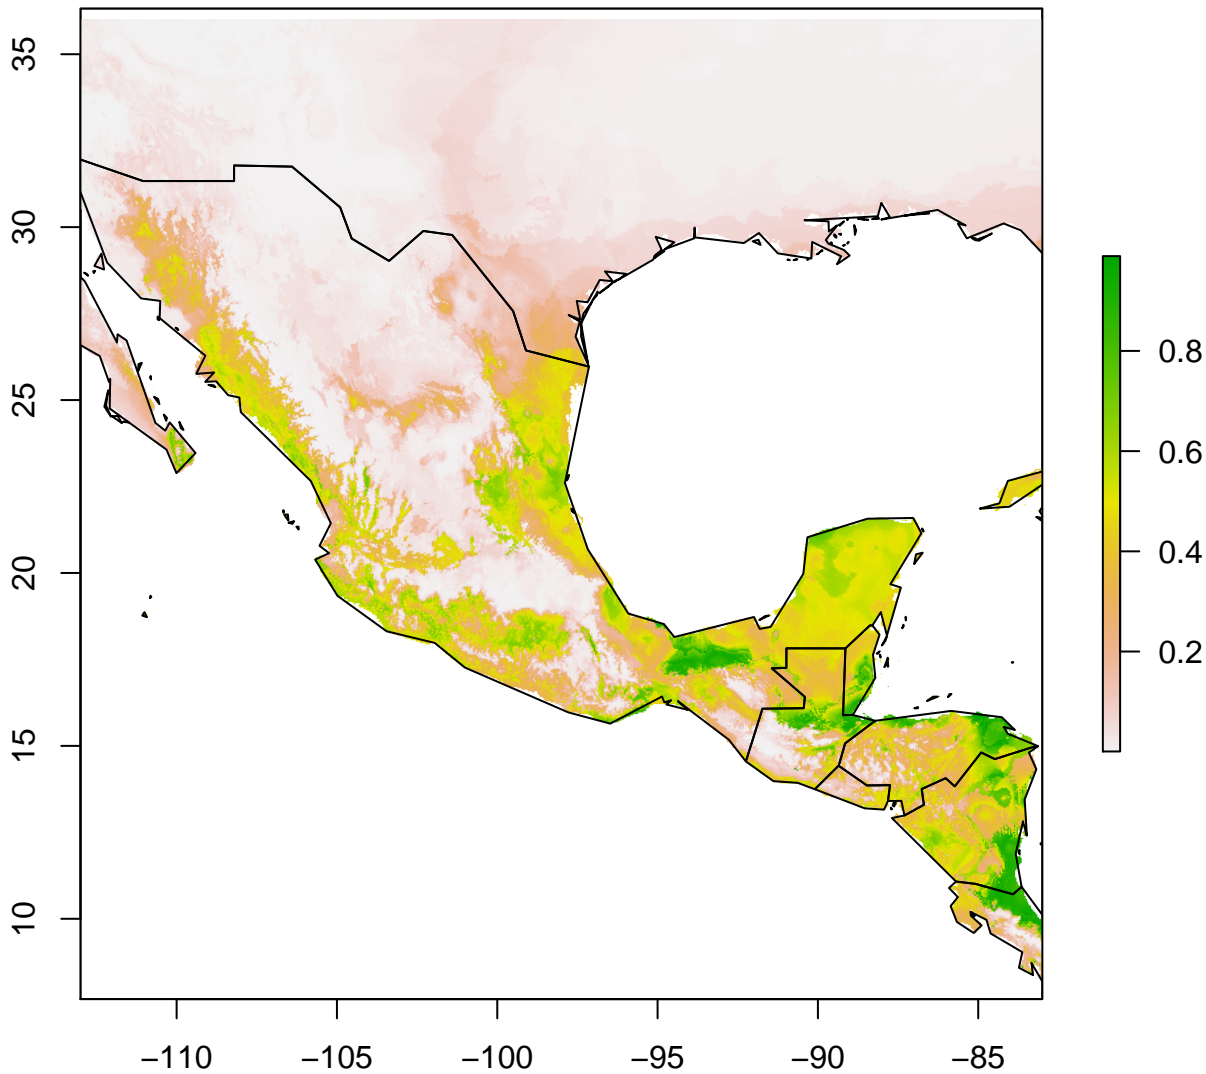

**MaxEnt model for mid-Holocene  
climate model: HadGEM2-CC**

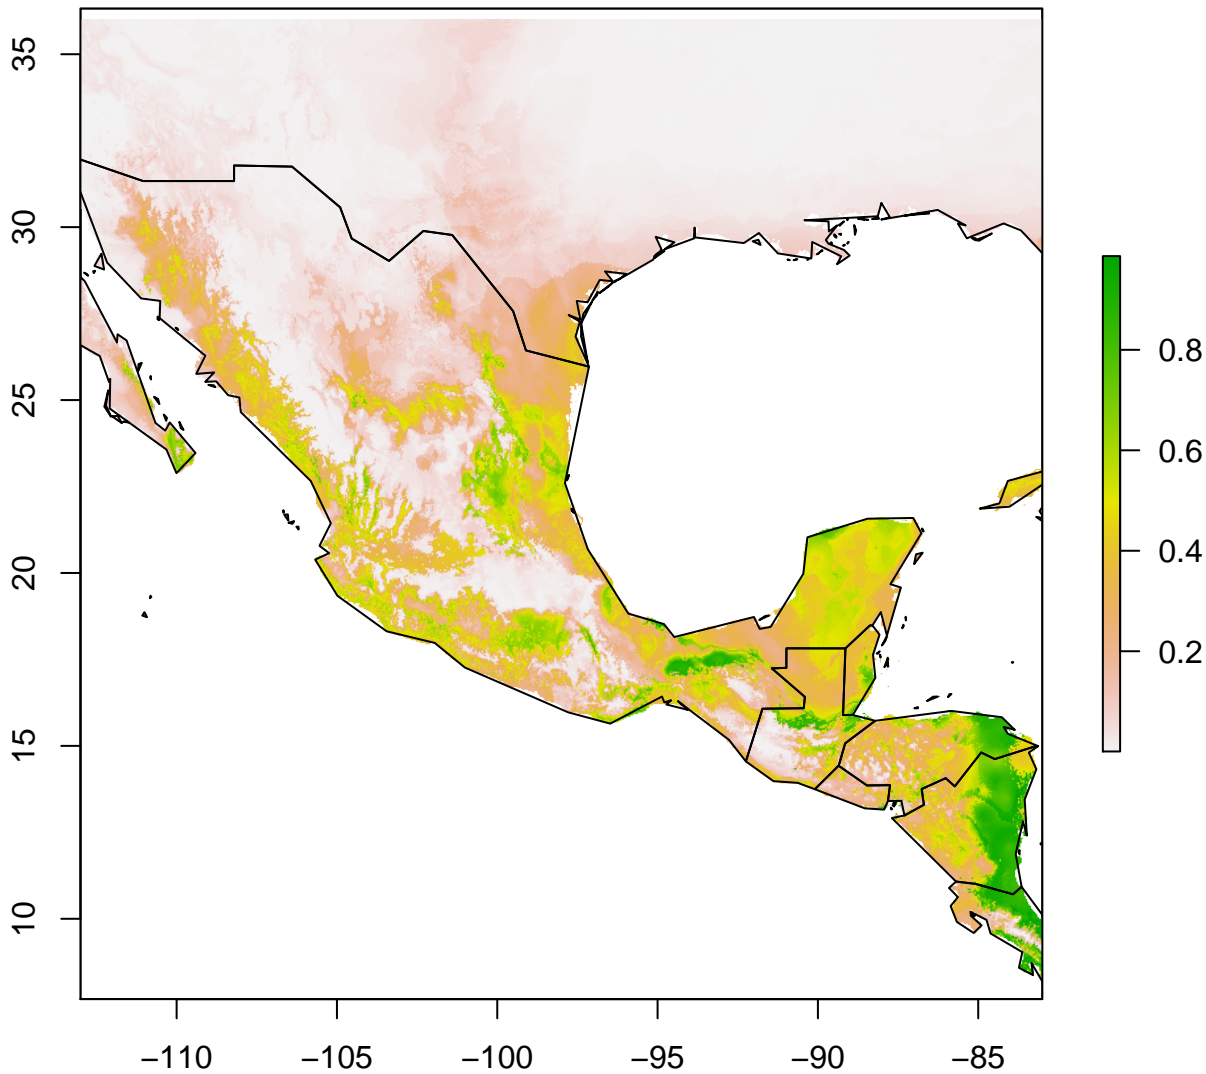

**MaxEnt model for mid-Holocene  
climate model: HadGEM2-ES**

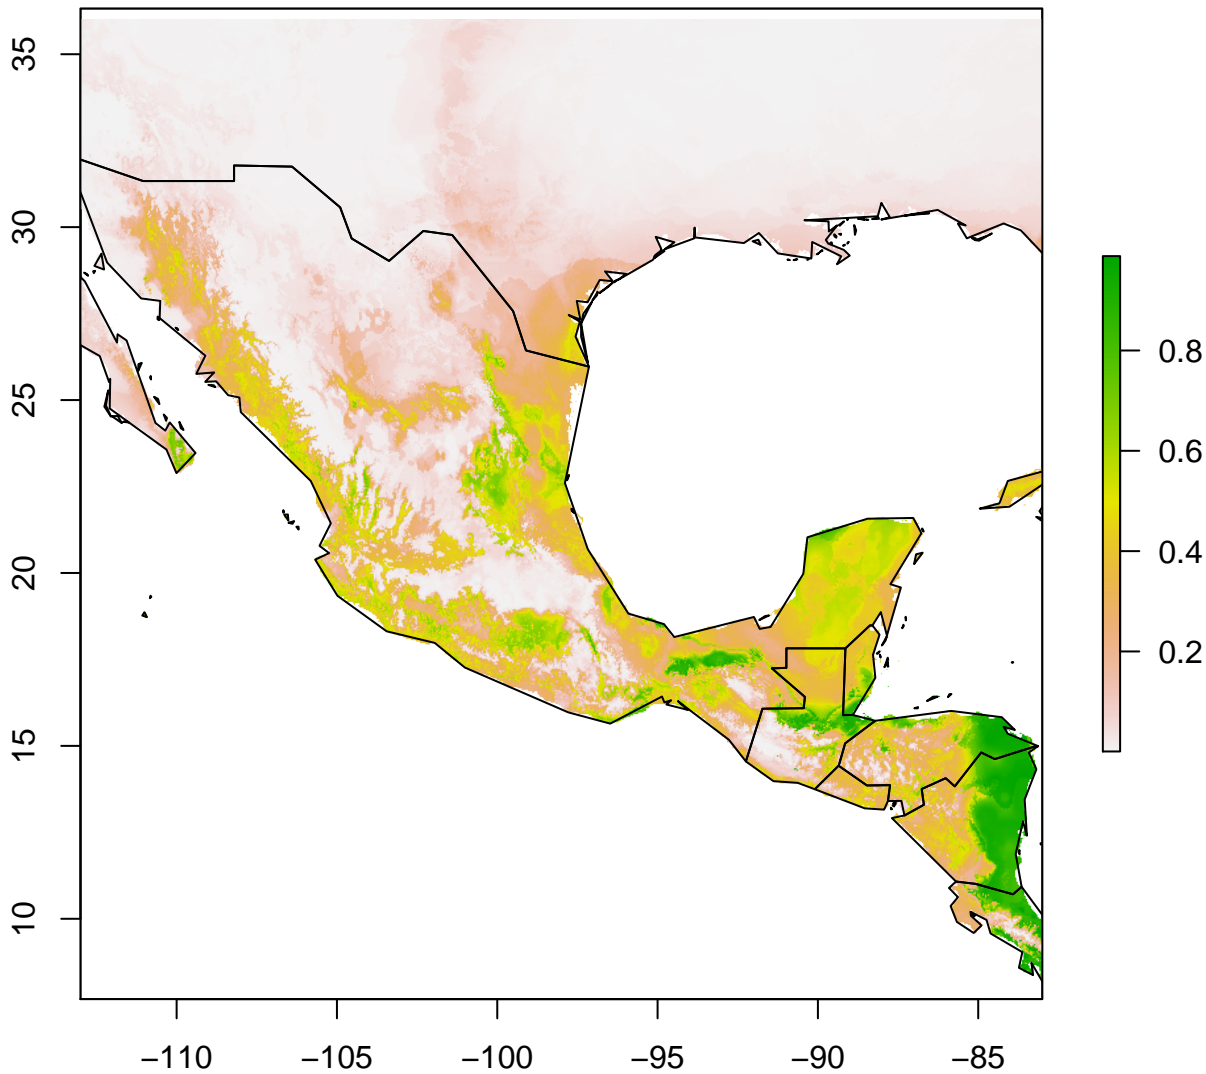

**MaxEnt model for mid-Holocene  
climate model: IPSL-CM5A-LR**

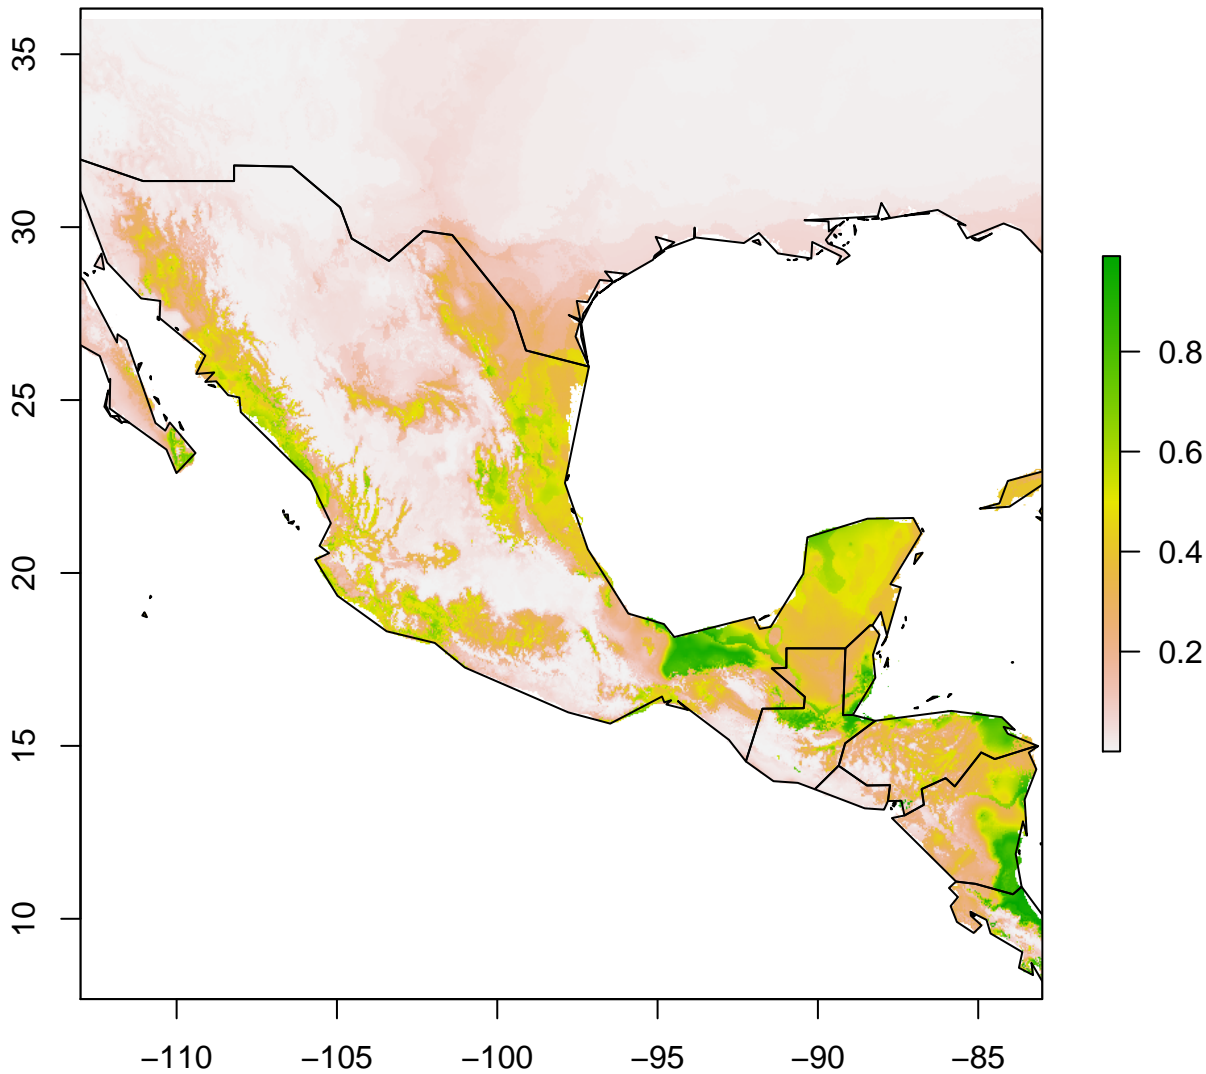

**MaxEnt model for mid-Holocene  
climate model: MPI-ESM-P**

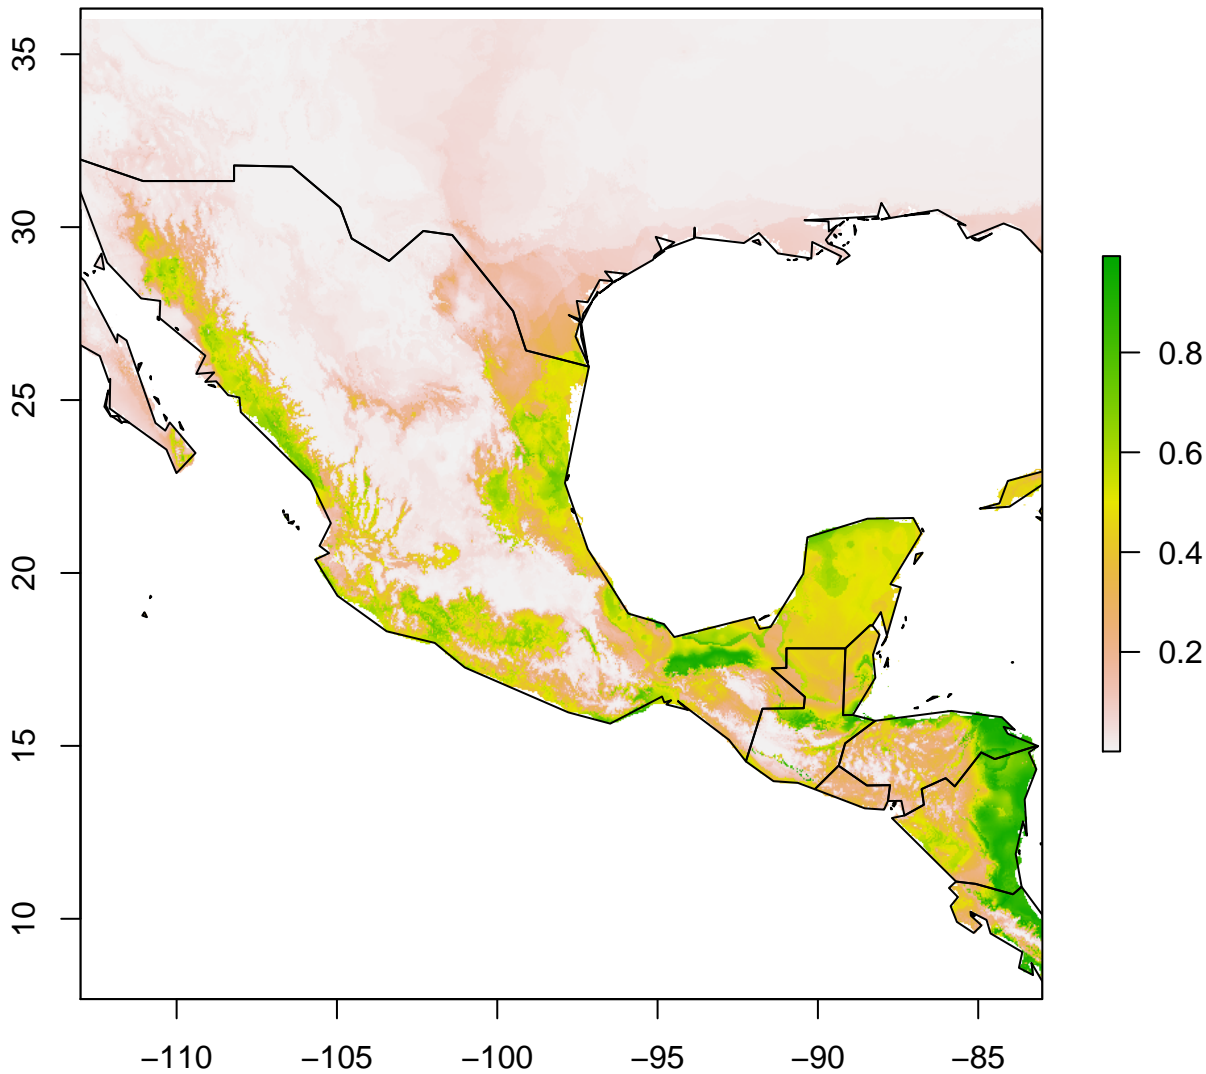

**MaxEnt model for mid-Holocene  
climate model: MRI-CGCM3**

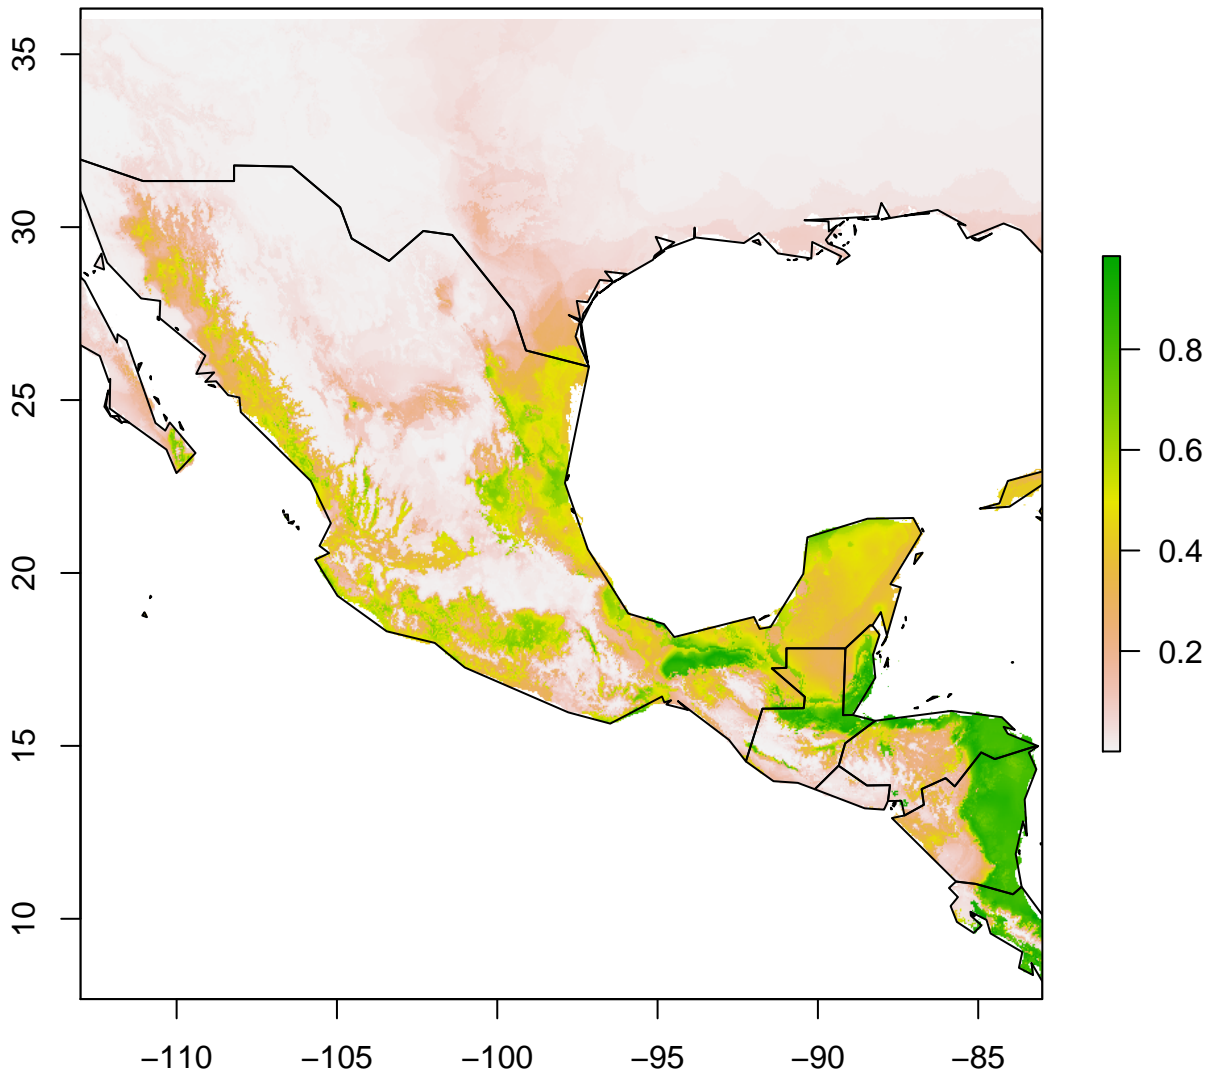



**MaxEnt model for mid-Holocene  
climate model: MIROC-ESM**

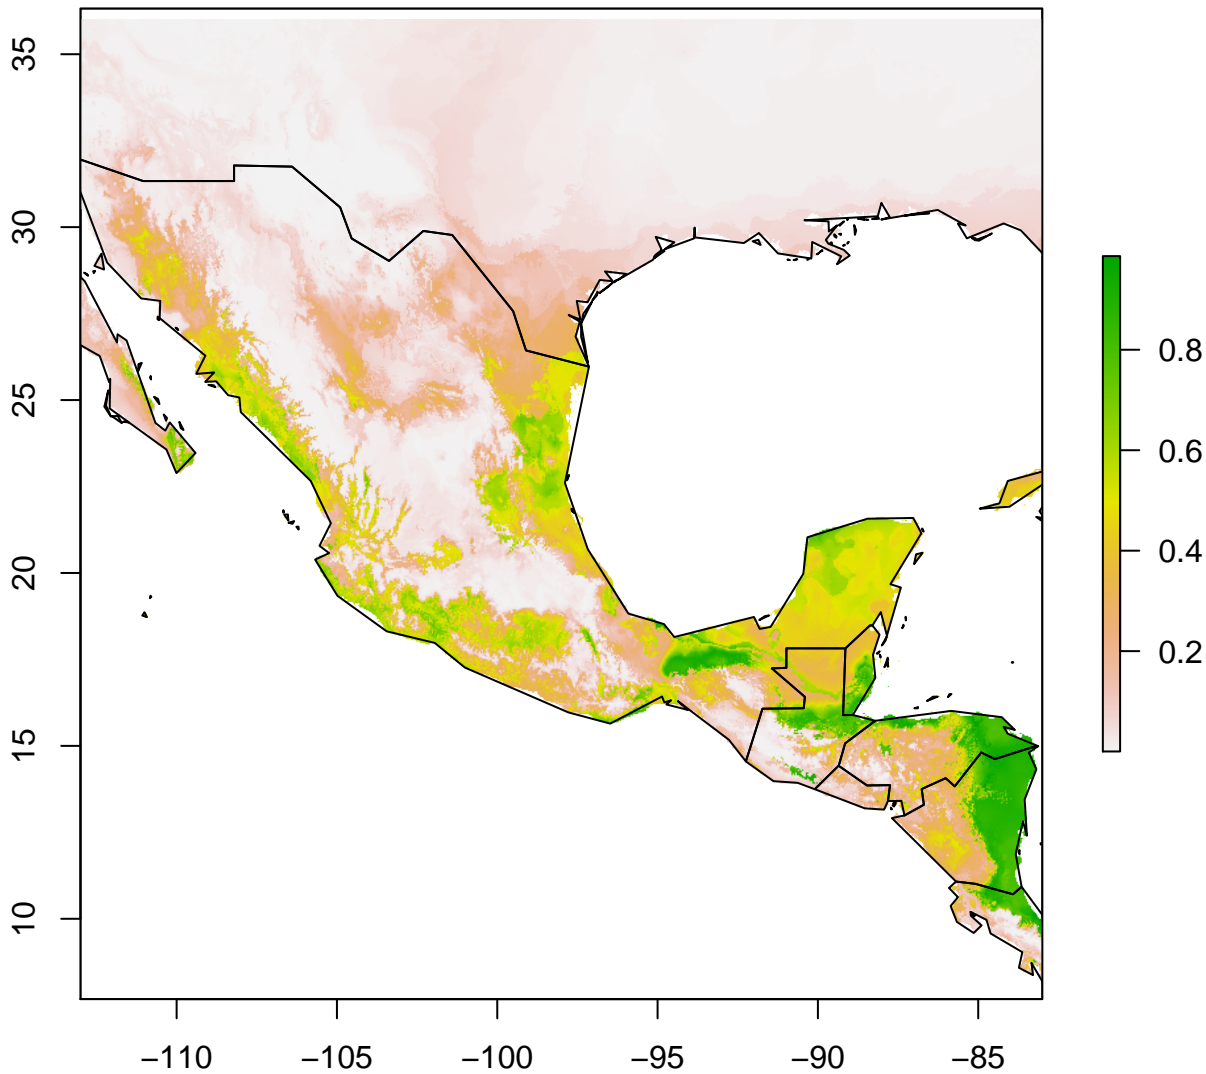

Supplement: 1308933111_pnas.1308933111.sfig04.pdf [file 1308933111_pnas.1308933111.sfig04.pdf]
