# Supplementary material
Source: PubMed Central journal article supplement (PMC4035960)

# MaxEnt model for current climate and occurrence points

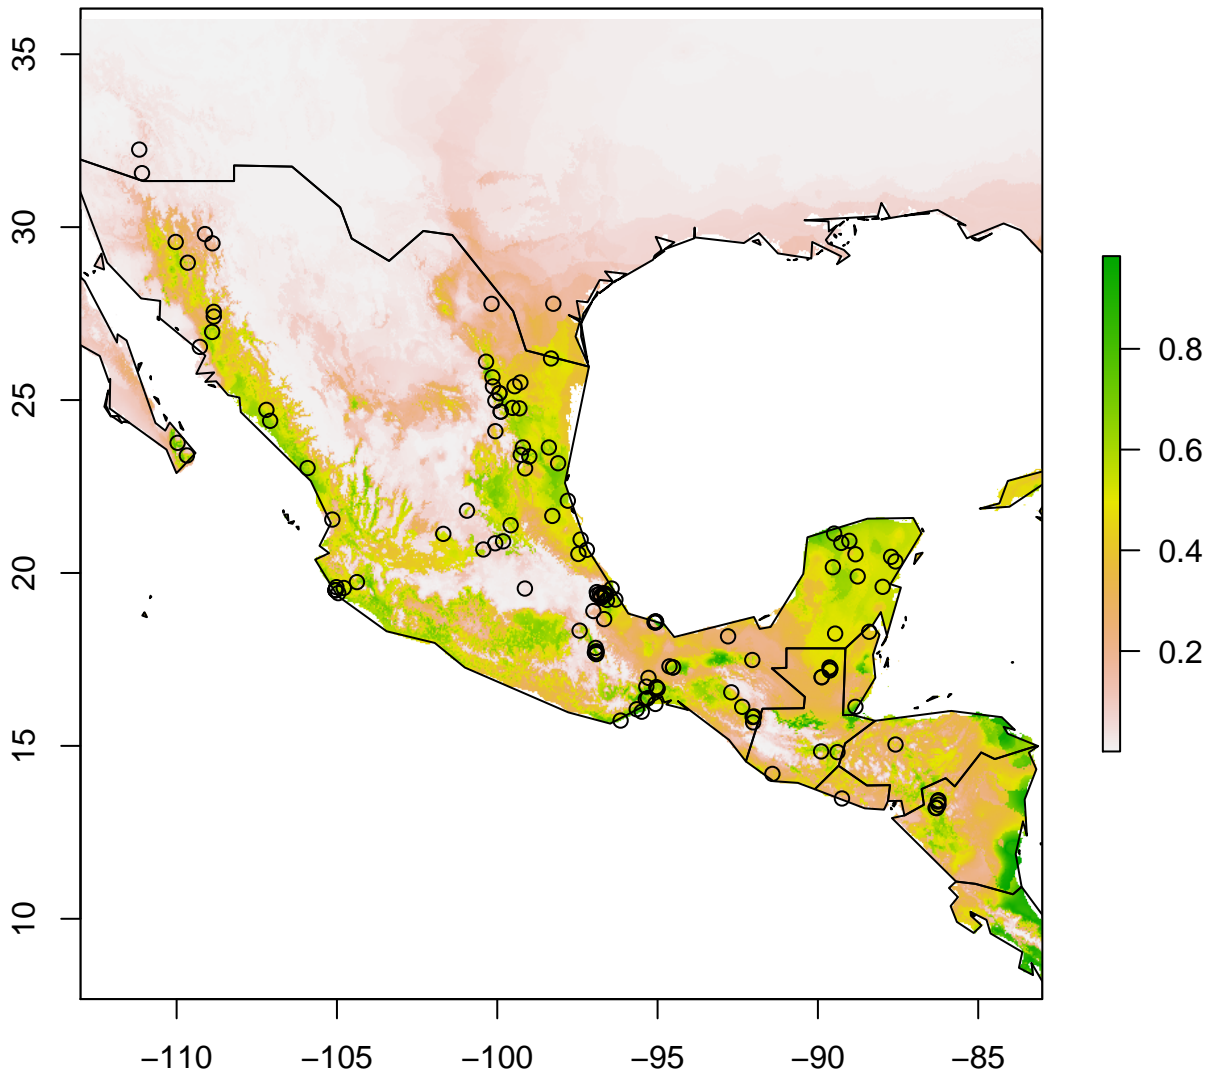

Supplement: 1308933111_pnas.1308933111.sfig01.pdf [file 1308933111_pnas.1308933111.sfig01.pdf]

# Mid-Holocene model ensemble minus model for the current climate

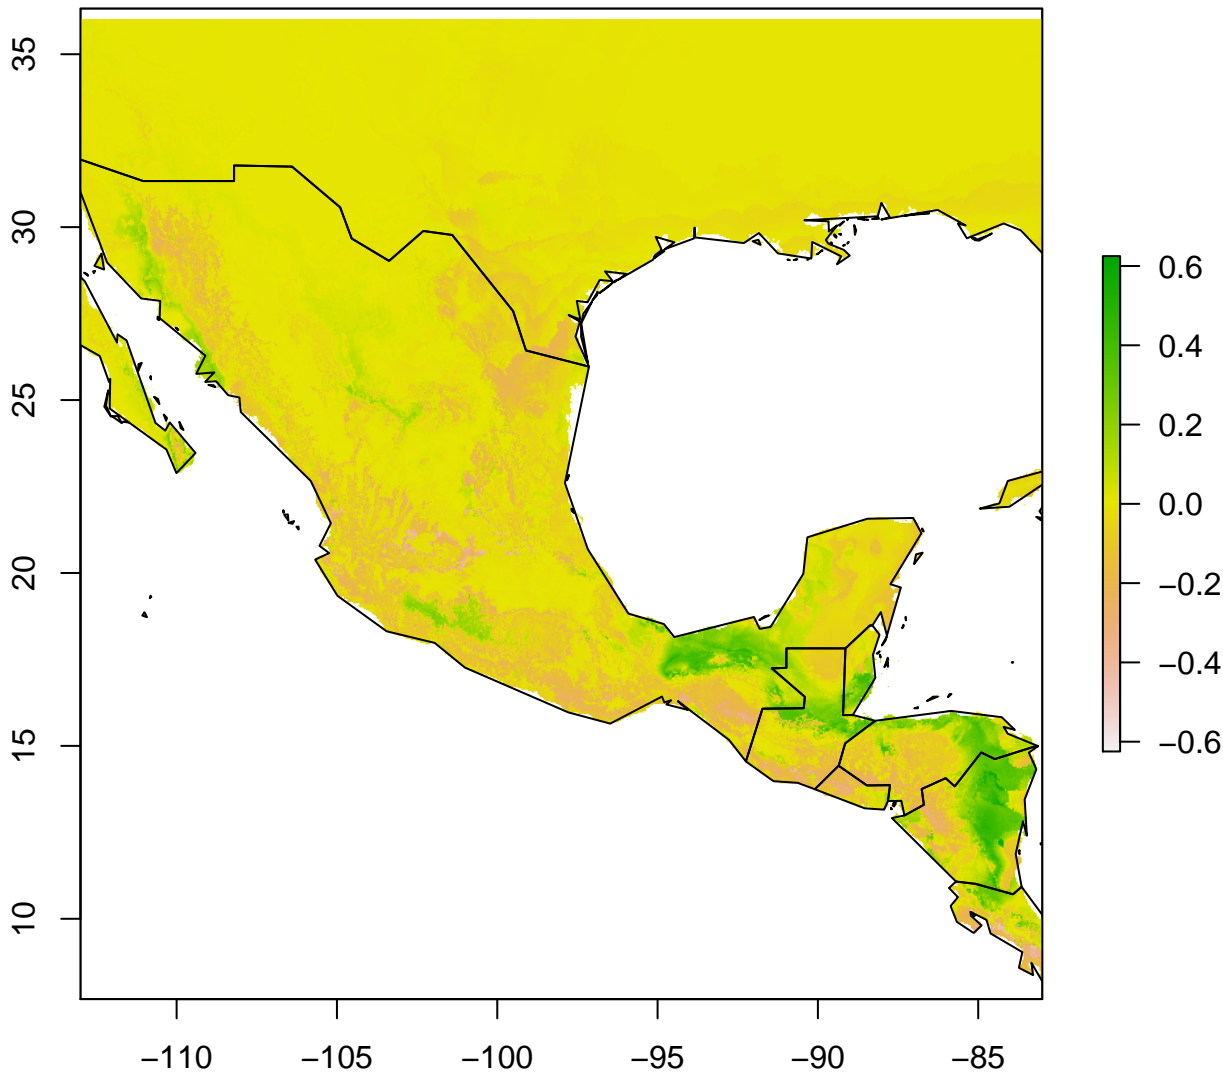

Supplement: 1308933111_pnas.1308933111.sfig02.pdf [file 1308933111_pnas.1308933111.sfig02.pdf]
